# Supplementary material for: A systems pharmacology model for inflammatory bowel disease
Source: PubMed Central journal article supplement (PMC5841748; doi:10.1371/journal.pone.0192949), 2018-03-07
Supplement: pone.0192949.s001.pdf [file pone.0192949.s001.pdf]

**Table\_S1: Abbreviations**

| ABBREVIATION | MEANING                                                               |
|--------------|-----------------------------------------------------------------------|
| BF           | Boolean Function                                                      |
| CD           | Crohn's disease                                                       |
| CD4_NKG2D    | NKG2D receptor of CD4+ T cells                                        |
| CD8_NKG2D    | NKG2D receptor of CD8+ T cells                                        |
| DC           | Dendritic cell                                                        |
| DEF          | Defensin                                                              |
| FIBROBLAST   | Fibroblast                                                            |
| GRANZB       | Granzyme B                                                            |
| IBD          | Inflammatory Bowel Disease                                            |
| IEC_MICA_B   | MHC class I-chain related gene A and B of intestinal epithelial cells |
| IEC_ULPB1_6  | NKG2D ligands                                                         |
| IFN $\gamma$ | Interferon gamma (IFN $\gamma$ )                                      |
| IL1b         | Interleukin 1 beta                                                    |
| IL10         | Interleukin 10                                                        |
| IL12         | Interleukin 12                                                        |
| IL13         | Interleukin 13                                                        |
| IL15         | Interleukin 15                                                        |
| IL18         | Interleukin 18                                                        |
| IL17         | Interleukin 17                                                        |
| IL21         | Interleukin 2                                                         |
| IL22         | Interleukin 22                                                        |
| IL23         | Interleukin 23                                                        |
| IL2          | Interleukin 2                                                         |
| IL4          | Interleukin 4                                                         |
| IL6          | Interleukin 6                                                         |
| LPS          | Lipopolysaccharide                                                    |
| MACR         | Macrophage or Monocyte                                                |
| MDP          | Muramyl-dipeptide                                                     |

|          |                                           |
|----------|-------------------------------------------|
| MMPs     | Matrix Metalloproteinases                 |
| NFκB     | Nuclear factor Kb                         |
| NOD2     | Nucleotide-binding oligomerization domain |
| NK       | Natural killer cells                      |
| NK_NKG2D | NKG2D receptor of Natural Killer cells    |
| PERFOR   | Perforin                                  |
| PGN      | Peptidoglycan                             |
| SP       | Systems Pharmacology                      |
| TGFb     | Transforming growth factor beta           |
| Th0      | Activated CD4+ T cell                     |
| Th0_M    | Activated CD4+ MemoryT cell               |
| Th1      | CD4+ T helper 1 cell                      |
| Th17     | CD4+ T helper 17 cell                     |
| Th17_M   | CD4+ T Memory helper 17 cell              |
| Th2      | CD4+ T helper 2 cell                      |
| TLR2     | Toll-Like Receptor 2                      |
| TLR4     | Toll-Like Receptor 4                      |
| TNFα     | Tumor necrosis factor-alpha (TNFα)        |
| Treg     | T regulatory cell                         |
| UC       | Ulcerative colitis                        |
